# Supplementary material for: Enrichment of Tumor-Infiltrating B Cells in Group 4 Medulloblastoma in Children
Source: MDPI journal article supplement (doi:10.3390/ijms23095287), 2022-05-09
Supplement: s1 [file s1]

**Table S1.** Demography, molecular subgroup, clinical data, and molecular-clinical correlation in SickKids cohort of MBs.

| Molecular subgroup assignment                                          |                       |                        |                            |                           |
|------------------------------------------------------------------------|-----------------------|------------------------|----------------------------|---------------------------|
| N = 763                                                                | WNT n = 70<br>(18.9%) | SHH n = 223<br>(42.7%) | Group 3 n = 144<br>(29.2%) | Group 4 n = 326<br>(9.2%) |
| Age (median, range) at diagnosis (years)                               |                       |                        |                            |                           |
| 8.0 (0.24–56.8)                                                        | 10.8 (2–56.3)         | 8.8 (0.2–56.8)         | 5.1 (1.2–49.6)             | 8.0 (1.0–48.2)            |
| ≤3y (n = 119, 16.3%)                                                   | 2 (3.1%)              | 70 (32.6%)             | 31 (22.8%)                 | 16 (5.1%)                 |
| >3y (n = 610, 83.7%)                                                   | 62 (96.9%)            | 145 (67.4%)            | 105 (77.2%)                | 298 (94.9%)               |
| Sex                                                                    |                       |                        |                            |                           |
| Male, n = 472 (65.6%)                                                  | 29 (45.3%)            | 128 (61.0%)            | 99 (72.3%)                 | 216 (70.1%)               |
| Female, n = 247 (34.4%)                                                | 35 (54.7%)            | 82 (39.0%)             | 38 (27.7%)                 | 92 (29.9%)                |
| Male/female ratio (1.9/1)                                              | 0.8/1                 | 1.6/1                  | 2.6/1                      | 2.3/1                     |
| Metastasis stage at diagnosis (M0, Met), number of cases (percentage)  |                       |                        |                            |                           |
| M0, n = 397 (69.3%)                                                    | 43 (87.8%)            | 134 (83.8%)            | 66 (60.6%)                 | 154 (60.4%)               |
| Met, n = 176 (30.7%)                                                   | 6 (12.2%)             | 26 (16.2%)             | 43 (39.4%)                 | 101 (39.6%)               |
| Pathology variant, number of cases (percentage) and median age (years) |                       |                        |                            |                           |
| Classic, n = 387 (66.0%), 8.0                                          | 40 (80.0%)            | 78 (43.1%)             | 68 (66.0%)                 | 201 (79.8%)               |
| DNMB, n = 109 (18.6%), 5.2                                             | 5 (10.0%)             | 73 (40.3%)             | 8 (7.8%)                   | 23 (9.1%)                 |
| MBEN, n = 18 (3.1%), 2.4                                               | 0                     | 10 (5.5%)              | 2 (1.9%)                   | 6 (2.4%)                  |
| LCA, n = 72 (12.3%), 7.0                                               | 5 (10.0%)             | 20 (11.0%)             | 25 (24.3%)                 | 22 (8.7%)                 |
| Median follow-up time (range) (years)                                  |                       |                        |                            |                           |
| 3.9 (0–25.0)                                                           | 4.2 (1.1–17.9)        | 3.9 (0.1–25.0)         | 3.0 (0–19.0).              | 4.2 (0–22.0)              |
| Survivals of molecular subgroup (percentage)                           |                       |                        |                            |                           |
| 5-year OS rate: 74.9%                                                  | 98.2%                 | 79.1%                  | 56.9%                      | 75.0%                     |

DNMB: Desmoplastic/nodular medulloblastoma, MBEN: Medulloblastoma with extensive nodularity, LCA: Large-cell/anaplastic, M0: no metastasis of tumors, Met: metastasis of tumors, OS: Overall survival.

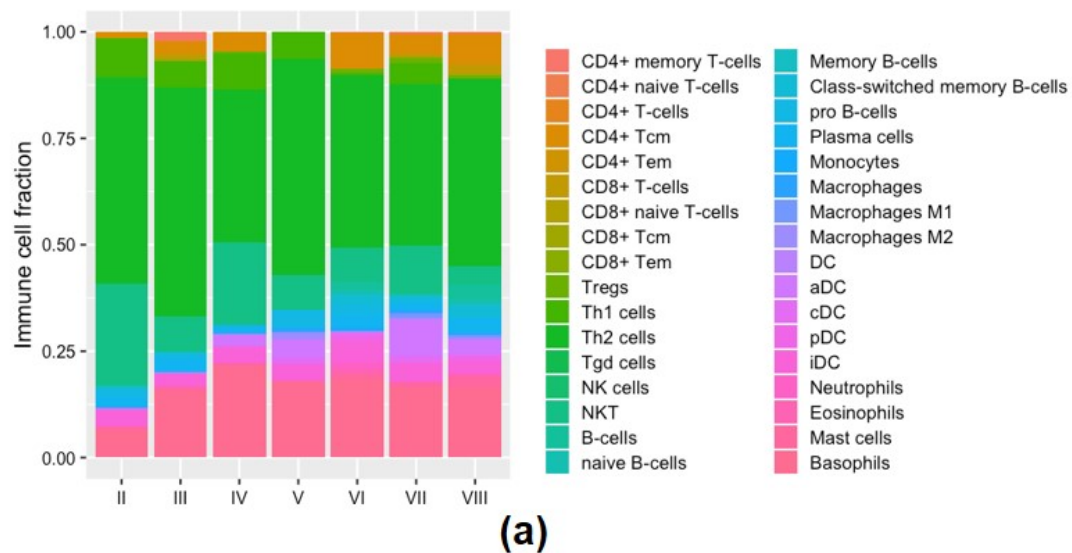

|                               | WNT-α     | WNT-β     | SHH-α     | SHH-β     | SHH-γ     | II        | III       | IV        | V         | VI        | VII       | VIII      | MB        |
|-------------------------------|-----------|-----------|-----------|-----------|-----------|-----------|-----------|-----------|-----------|-----------|-----------|-----------|-----------|
| CD4+ memory T-cells           | 7.819e-03 | 0.000e+00 | 1.226e-03 | 2.750e-19 | 6.046e-19 | 1.533e-19 | 1.006e-02 | 6.805e-19 | 0.000e+00 | 4.894e-04 | 1.761e-03 | 1.978e-03 | 1.944e-03 |
| CD4+ naive T-cells            | 2.957e-04 | 7.978e-03 | 4.480e-04 | 5.189e-18 | 3.113e-18 | 4.419e-18 | 2.689e-03 | 1.047e-18 | 7.434e-18 | 1.004e-18 | 1.158e-18 | 1.949e-18 | 9.509e-04 |
| CD4+ T-cells                  | 1.586e-18 | 0.000e+00 | 1.473e-18 | 2.300e-18 | 4.418e-18 | 1.222e-18 | 3.216e-20 | 4.169e-18 | 2.145e-19 | 1.191e-18 | 1.630e-18 | 4.259e-04 | 3.549e-05 |
| CD4+ Tcm                      | 4.022e-02 | 4.408e-02 | 2.230e-03 | 1.399e-03 | 2.661e-03 | 8.214e-03 | 1.618e-02 | 2.581e-02 | 4.739e-18 | 4.249e-02 | 2.440e-02 | 3.209e-02 | 1.998e-02 |
| CD4+ Tem                      | 7.941e-18 | 0.000e+00 | 4.643e-04 | 4.194e-03 | 2.326e-18 | 4.192e-18 | 2.772e-18 | 1.096e-17 | 3.233e-18 | 7.166e-18 | 3.907e-18 | 4.167e-18 | 3.882e-04 |
| CD8+ T-cells                  | 1.220e-03 | 0.000e+00 | 9.707e-04 | 1.955e-18 | 4.038e-03 | 2.365e-03 | 7.985e-03 | 4.816e-19 | 5.123e-19 | 2.836e-19 | 3.920e-03 | 9.353e-03 | 2.488e-03 |
| CD8+ naive T-cells            | 3.073e-03 | 1.020e-18 | 2.998e-04 | 1.191e-03 | 4.611e-03 | 1.100e-18 | 2.205e-20 | 1.335e-18 | 5.712e-19 | 1.015e-18 | 9.728e-05 | 1.835e-03 | 9.256e-04 |
| CD8+ Tcm                      | 4.958e-19 | 7.676e-19 | 1.404e-03 | 1.835e-18 | 8.439e-04 | 3.326e-18 | 2.027e-03 | 1.596e-18 | 1.178e-17 | 9.761e-19 | 9.550e-04 | 6.803e-19 | 4.358e-04 |
| CD8+ Tem                      | 1.105e-19 | 0.000e+00 | 6.421e-19 | 3.606e-18 | 2.738e-18 | 1.342e-17 | 1.116e-18 | 1.201e-18 | 0.000e+00 | 1.336e-18 | 1.400e-18 | 1.622e-18 | 2.266e-18 |
| Tregs                         | 5.797e-18 | 0.000e+00 | 2.996e-04 | 9.576e-03 | 1.018e-02 | 1.222e-18 | 3.396e-19 | 2.878e-03 | 2.531e-18 | 6.167e-03 | 6.525e-03 | 3.653e-03 | 3.273e-03 |
| Th1 cells                     | 7.733e-03 | 1.842e-02 | 3.519e-02 | 1.121e-03 | 2.077e-02 | 6.402e-02 | 3.574e-02 | 4.900e-02 | 3.820e-02 | 2.126e-03 | 2.441e-02 | 2.411e-18 | 2.473e-02 |
| Th2 cells                     | 2.685e-01 | 1.725e-01 | 2.326e-01 | 1.386e-01 | 2.243e-01 | 3.366e-01 | 3.093e-01 | 2.060e-01 | 3.065e-01 | 2.026e-01 | 1.905e-01 | 1.999e-01 | 2.323e-01 |
| Tgd cells                     | 6.639e-18 | 3.520e-18 | 3.033e-18 | 8.239e-18 | 5.328e-18 | 4.934e-18 | 0.000e+00 | 1.210e-17 | 0.000e+00 | 6.119e-18 | 3.028e-18 | 4.027e-18 | 4.747e-18 |
| NK cells                      | 2.533e-18 | 1.656e-18 | 8.899e-18 | 5.085e-18 | 4.612e-18 | 1.155e-17 | 9.227e-19 | 0.000e+00 | 7.726e-18 | 3.930e-18 | 2.690e-18 | 1.313e-18 | 4.243e-18 |
| NKT                           | 2.407e-03 | 7.460e-03 | 1.227e-02 | 1.150e-01 | 3.617e-02 | 1.668e-01 | 4.769e-02 | 1.121e-01 | 4.930e-02 | 4.057e-02 | 5.796e-02 | 1.997e-02 | 5.563e-02 |
| B-cells                       | 0.000e+00 | 4.980e-04 | 3.134e-18 | 6.764e-19 | 1.608e-03 | 2.077e-03 | 3.888e-19 | 1.287e-18 | 0.000e+00 | 1.018e-02 | 1.532e-03 | 1.575e-02 | 2.637e-03 |
| naive B-cells                 | 3.805e-04 | 8.021e-03 | 8.556e-19 | 7.582e-18 | 5.500e-19 | 1.759e-18 | 8.164e-04 | 3.401e-19 | 0.000e+00 | 4.499e-03 | 9.342e-04 | 5.045e-03 | 1.641e-03 |
| Memory B-cells                | 5.847e-18 | 2.370e-19 | 9.305e-18 | 1.443e-17 | 3.903e-18 | 1.022e-03 | 7.765e-18 | 5.332e-18 | 0.000e+00 | 1.646e-03 | 1.339e-04 | 9.295e-04 | 3.109e-04 |
| Class-switched memory B-cells | 4.022e-19 | 0.000e+00 | 3.928e-18 | 8.513e-18 | 1.187e-18 | 4.270e-03 | 1.135e-03 | 2.924e-18 | 8.002e-19 | 1.114e-02 | 3.511e-03 | 1.195e-02 | 2.667e-03 |
| pro B-cells                   | 4.774e-18 | 3.113e-19 | 1.608e-03 | 4.027e-20 | 3.273e-03 | 1.217e-02 | 7.367e-03 | 2.351e-19 | 2.496e-02 | 1.180e-02 | 4.631e-03 | 2.165e-03 | 5.664e-03 |
| Plasma cells                  | 5.354e-03 | 6.131e-03 | 2.627e-03 | 2.529e-03 | 4.619e-03 | 1.788e-02 | 1.710e-02 | 1.282e-02 | 1.753e-03 | 1.476e-02 | 8.749e-03 | 1.508e-02 | 9.117e-03 |
| Monocytes                     | 1.123e-02 | 7.951e-18 | 4.005e-03 | 1.208e-02 | 1.743e-18 | 1.720e-19 | 3.494e-19 | 1.358e-17 | 0.000e+00 | 4.049e-03 | 2.936e-18 | 3.990e-18 | 2.613e-03 |
| Macrophages                   | 1.915e-02 | 1.097e-02 | 1.328e-02 | 5.357e-02 | 1.878e-03 | 4.076e-19 | 3.910e-19 | 3.668e-18 | 3.237e-03 | 4.613e-19 | 3.216e-03 | 2.178e-03 | 8.956e-03 |
| Macrophages M1                | 1.474e-02 | 1.442e-02 | 2.118e-02 | 5.298e-02 | 9.292e-03 | 3.181e-19 | 3.240e-04 | 6.890e-06 | 2.727e-03 | 1.470e-04 | 5.375e-03 | 1.775e-03 | 1.025e-02 |
| Macrophages M2                | 1.523e-02 | 0.000e+00 | 6.498e-03 | 2.177e-02 | 1.599e-03 | 2.241e-19 | 1.265e-03 | 2.873e-19 | 8.556e-03 | 4.520e-20 | 1.194e-03 | 2.669e-03 | 4.898e-03 |
| DC                            | 2.815e-03 | 8.044e-04 | 1.033e-03 | 5.755e-03 | 9.060e-04 | 6.920e-20 | 1.941e-19 | 8.267e-19 | 2.798e-19 | 5.518e-19 | 6.909e-04 | 1.166e-19 | 1.000e-03 |
| aDC                           | 5.541e-02 | 4.017e-02 | 1.041e-01 | 7.822e-02 | 6.679e-02 | 1.068e-18 | 6.416e-19 | 1.551e-02 | 2.701e-02 | 2.140e-03 | 4.358e-02 | 1.585e-02 | 3.739e-02 |
| cDC                           | 4.717e-02 | 4.344e-02 | 3.285e-02 | 7.540e-02 | 2.043e-02 | 3.887e-03 | 1.846e-03 | 7.599e-04 | 8.326e-03 | 2.709e-03 | 7.162e-03 | 2.456e-03 | 2.054e-02 |
| pDC                           | 9.102e-19 | 1.329e-03 | 4.045e-03 | 1.624e-03 | 4.683e-18 | 5.020e-19 | 4.153e-04 | 3.246e-03 | 3.668e-04 | 6.995e-03 | 1.851e-03 | 4.288e-03 | 2.013e-03 |
| iDC                           | 4.717e-02 | 1.162e-01 | 2.453e-02 | 1.345e-01 | 1.930e-02 | 2.608e-02 | 1.500e-02 | 1.933e-02 | 2.310e-02 | 2.457e-02 | 2.168e-02 | 1.323e-02 | 4.039e-02 |
| Neutrophils                   | 6.434e-03 | 0.000e+00 | 1.762e-19 | 4.788e-03 | 4.407e-04 | 2.817e-04 | 2.791e-04 | 1.013e-03 | 5.678e-20 | 8.189e-03 | 3.478e-04 | 1.717e-03 | 1.958e-03 |
| Eosinophils                   | 1.411e-18 | 0.000e+00 | 3.884e-19 | 2.672e-03 | 4.661e-19 | 3.625e-18 | 2.298e-03 | 4.335e-19 | 3.749e-18 | 5.701e-03 | 8.965e-04 | 2.434e-03 | 1.167e-03 |
| Mast cells                    | 5.385e-03 | 7.085e-03 | 4.845e-03 | 8.796e-04 | 3.212e-03 | 5.557e-03 | 5.928e-03 | 3.977e-03 | 1.026e-03 | 6.471e-03 | 5.475e-03 | 1.081e-02 | 5.054e-03 |
| Basophils                     | 1.519e-02 | 1.303e-01 | 3.034e-02 | 1.299e-02 | 1.977e-02 | 4.498e-02 | 8.805e-02 | 1.230e-01 | 1.079e-01 | 9.211e-02 | 8.289e-02 | 7.472e-02 | 6.852e-02 |

(b)

**Figure S1. Analysis of immune cells and B cell subsets from the 70 MB patients based on the 2021 WHO classification of MB subgrouping.** (a) The proportion of T cells, B cells, macrophages, DCs, mast cells and other myeloid cells in MB tumors. (b) The distribution of lymphoid and myeloid cells enrichment.

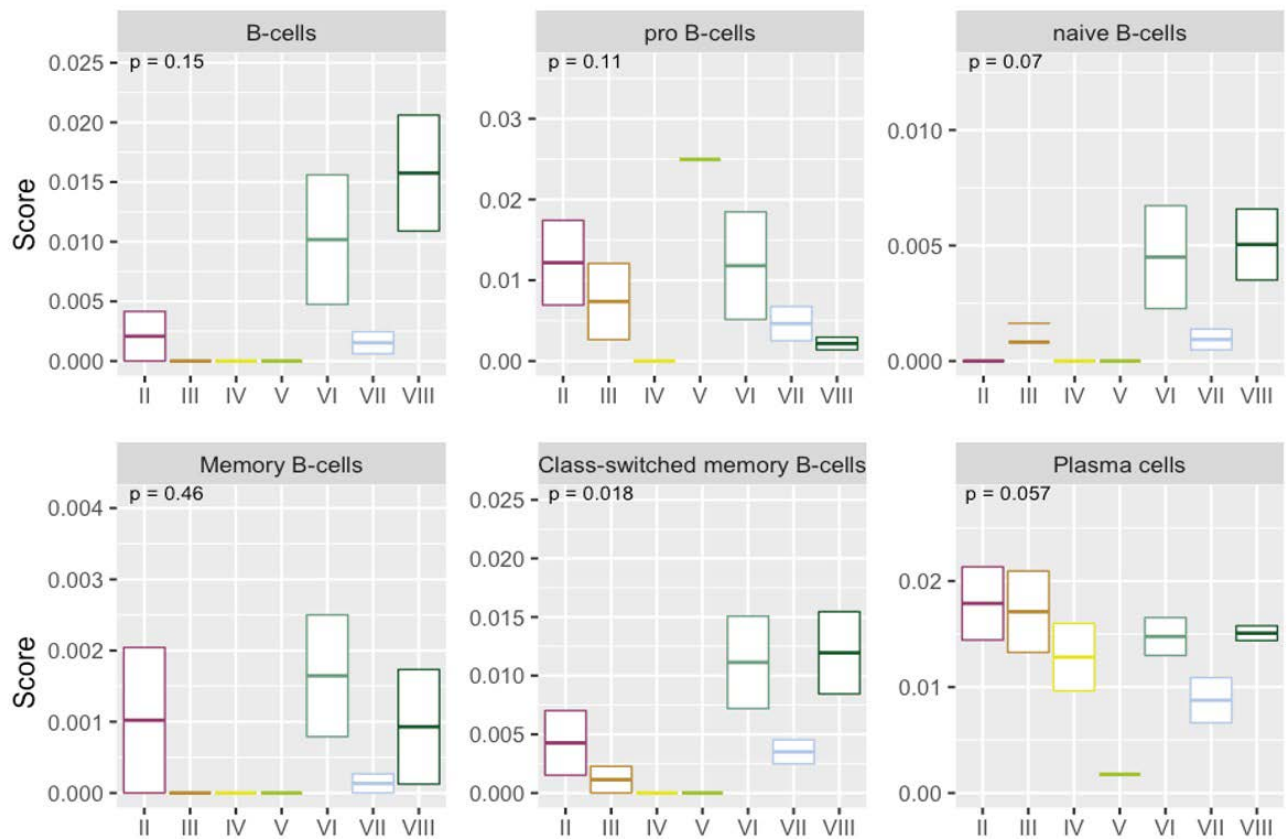

**Figure S2. Expression of the infiltrating B cells subsets from in the MB subgroups.** The analysis of B cell subsets from the 70 clinical patients based on the 2021 WHO classification of MB. The p values were determined by Kruskal-Wallis test.

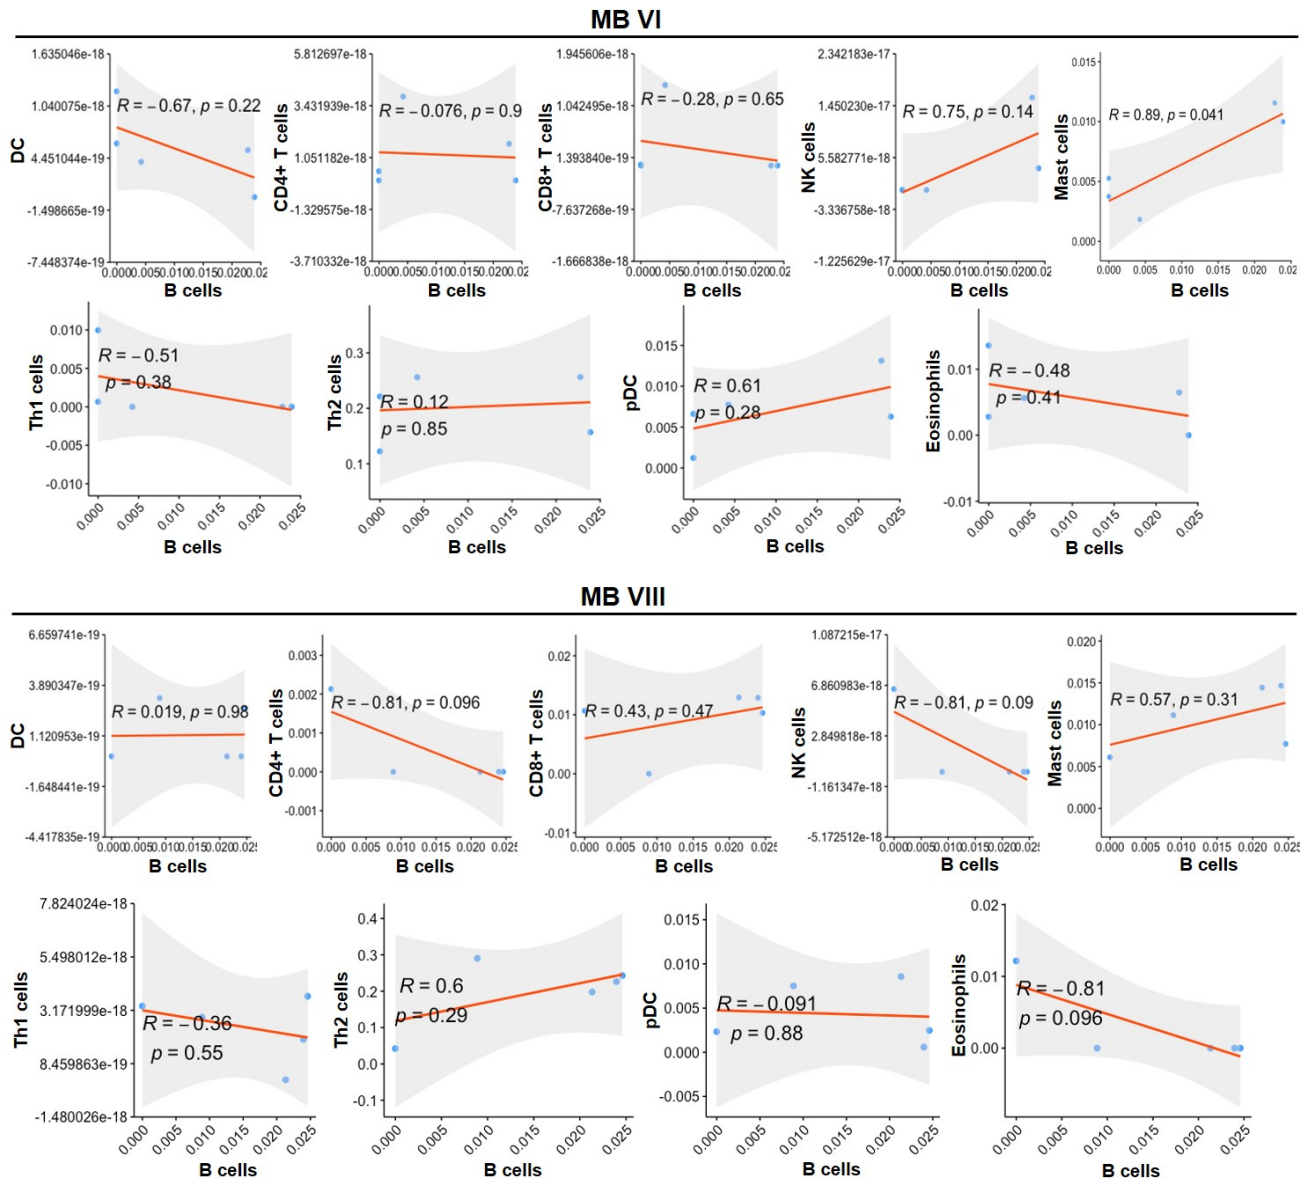

**Figure S3. Correlation of B cells with other immune cell types in the VI and VIII subgroups of MB tumors.** Correlation between the expression of B cells and the expression of DCs, CD4<sup>+</sup> T cells, CD8<sup>+</sup> T cells, NK cells, mast cells, Th1 cells, Th2 cells, pDCs and eosinophils in the VI and VIII subgroups of MB tumors. Correlation coefficients (R) were obtained by using Pearson's correlation coefficient test.

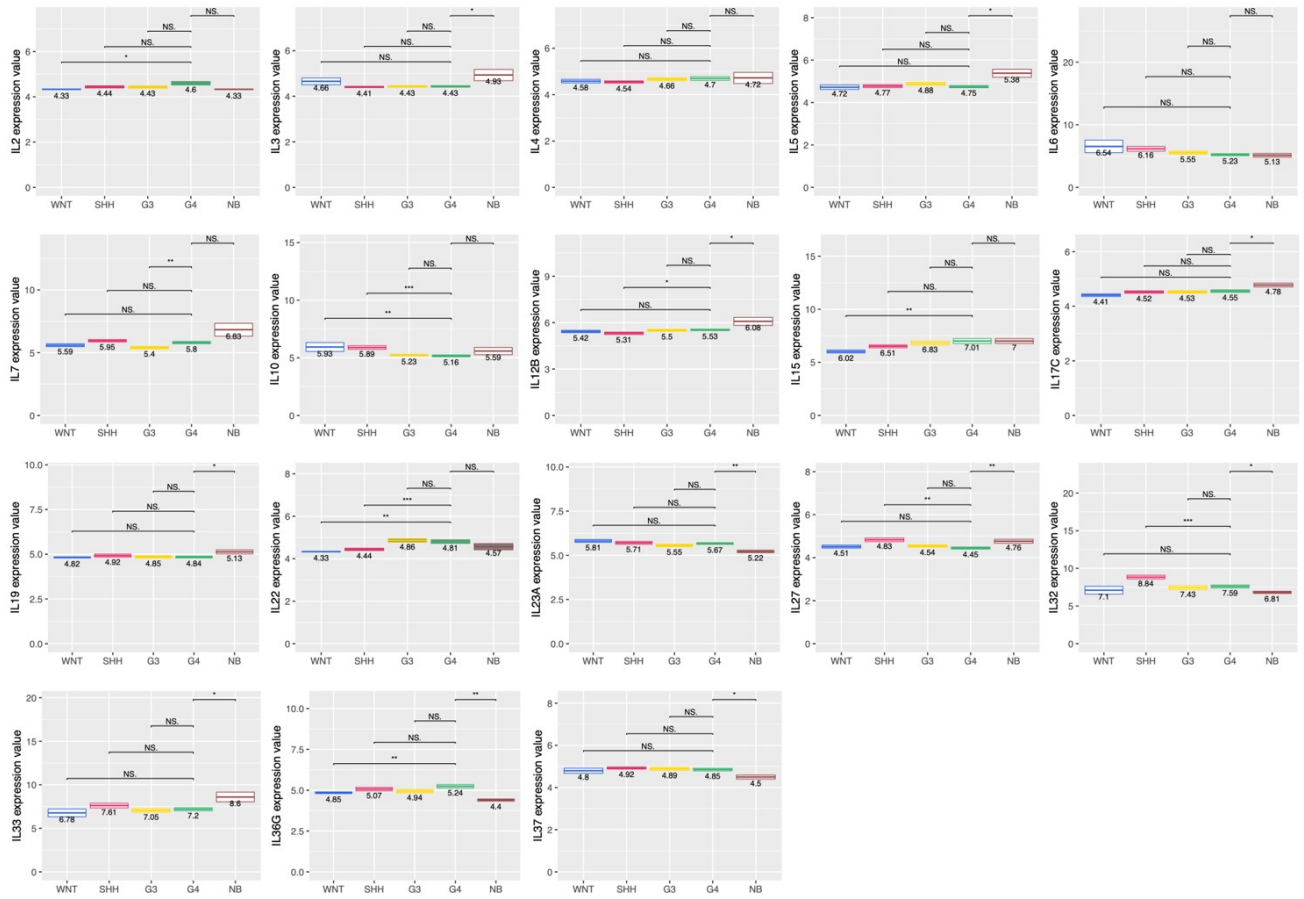

**Figure S4. Expression of interleukins in different MB subgroups tumors and normal brain.** The expressions of interleukins among 4 subgroups of MB tumors and normal brain tissue were analyzed from the transcriptome data. \*,  $p < 0.05$ ; \*\*,  $p < 0.01$ ; \*\*\*,  $p < 0.001$ , compared to G4 subgroup tumors. NS: no significant difference.



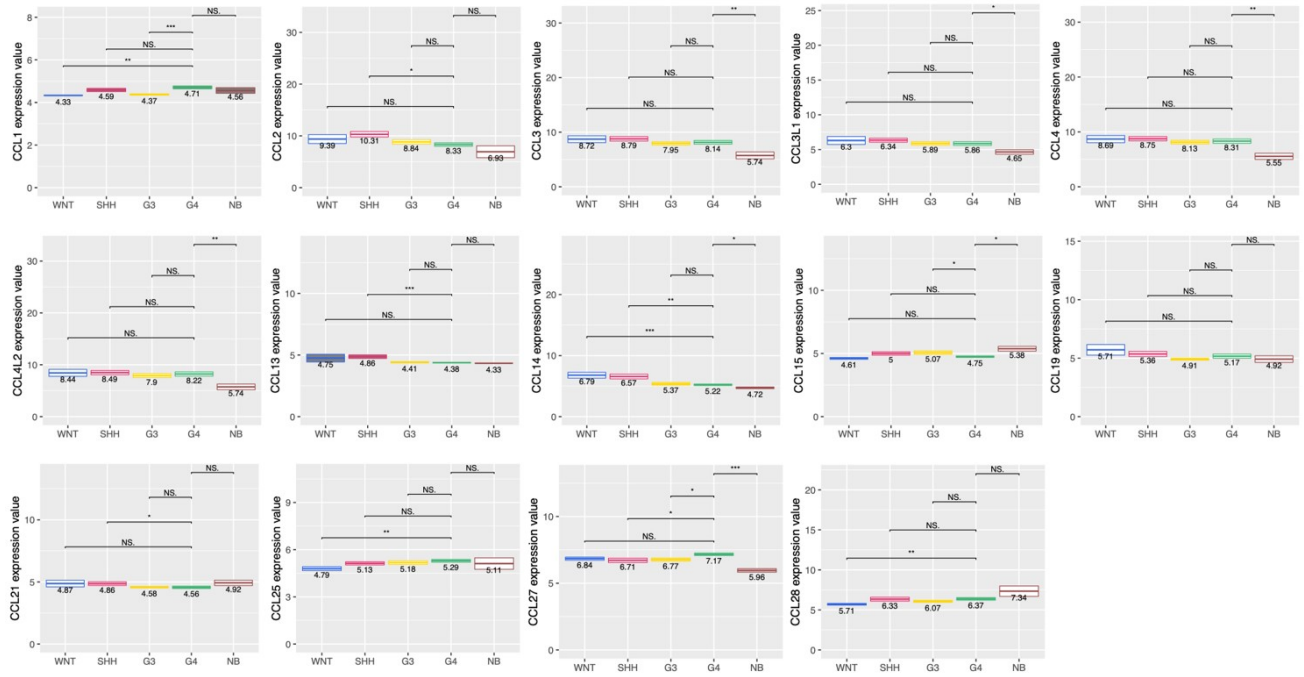

**Figure S5. Expression of CCL chemokines in different MB subgroups tumors and normal brain.** The expressions of CCL chemokines among 4 subgroups of MB tumors and normal brain tissue were analyzed from the transcriptome data. \*,  $p < 0.05$ ; \*\*,  $p < 0.01$ ; \*\*\*,  $p < 0.001$ , compared to G4 subgroup tumors. NS: no significant difference.

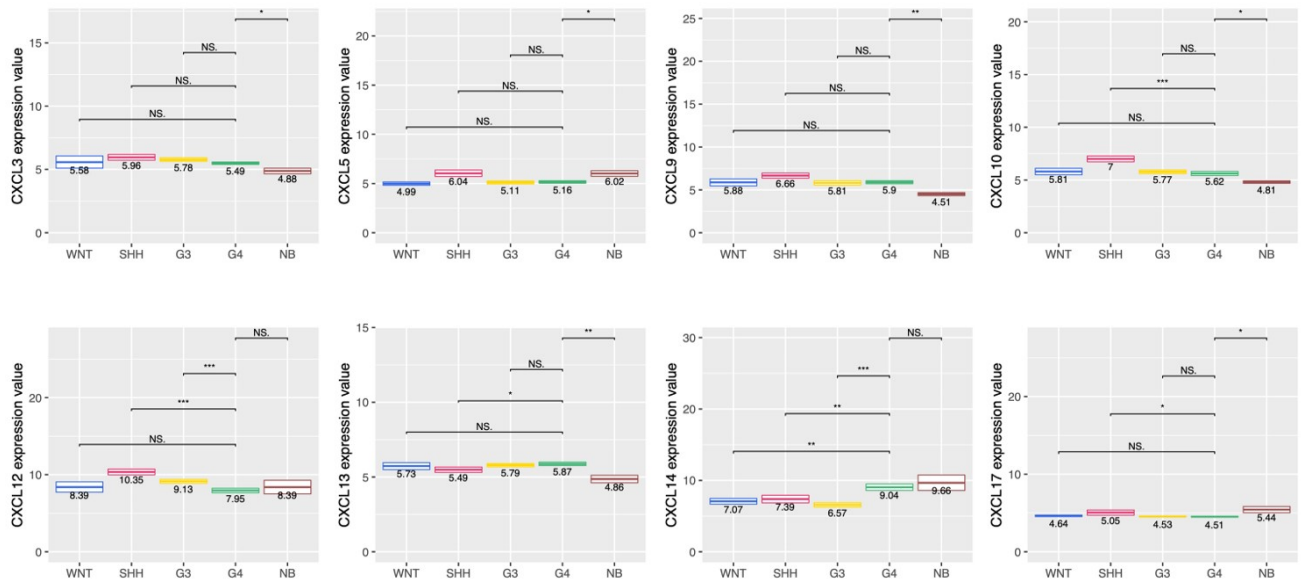

**Figure S6. Expression of CXCL chemokines in different MB subgroups tumors and normal brain.** The expressions of CXCL chemokines among 4 subgroups of MB tumors and normal brain tissue were analyzed from the transcriptome data. \*,  $p < 0.05$ ; \*\*,  $p < 0.01$ ; \*\*\*,  $p < 0.001$ , compared to G4 subgroup tumors. NS: no significant difference.
