# Supplementary material for: Enrichment of Tumor-Infiltrating B Cells in Group 4 Medulloblastoma in Children
Source: MDPI journal article supplement (doi:10.3390/ijms23095287), 2022-05-09
Supplement: s1 [file s1]

Archive with 1 entries (1 files):
- ijms-1628404-supplementary_supp.pdf
